# Supplementary material
Source: MDPI journal article supplement (https://www.mdpi.com/2073-4441/15/3/469)
Supplement: s1 [file s1]

# Supplementary Materials for Quantitative Microbial Risk Assessment

## for Private Wells in Flood-Impacted Areas

**Table S1. Median daily risk of infection for each age group and reference pathogen for drinking water**

|           | Reference Pathogen     |                        |                |            |                   |                      |
|-----------|------------------------|------------------------|----------------|------------|-------------------|----------------------|
| Age Group | <i>Cryptosporidium</i> | <i>E. coli</i> O157:H7 | <i>Giardia</i> | Norovirus  | <i>Salmonella</i> | <i>Campylobacter</i> |
| Infant    | 2.5591E-06             | 5.73E-09               | 1.73E-07       | 5.2501E-05 | 6.54E-09          | 4.53E-07             |
| Age 2-6   | 2.3718E-06             | 5.31E-09               | 1.60E-07       | 4.8659E-05 | 6.06E-09          | 4.20E-07             |
| Age 6-16  | 4.057E-06              | 9.08E-09               | 2.74E-07       | 8.3231E-05 | 2.84E-09          | 7.18E-07             |
| Adult     | 7.802E-06              | 1.75E-08               | 5.28E-07       | 1.6005E-04 | 1.99E-08          | 1.3817E-06           |

**Table S2. Median daily risk of infection for indirect ingestion exposure scenarios**

| Reference Pathogen     | Bathing     | Showering   | Brushing Teeth | Toilet Flushing | Washing Food and Dishes |
|------------------------|-------------|-------------|----------------|-----------------|-------------------------|
| <i>Campylobacter</i>   | 4.66137E-07 | 4.3203E-07  | 1.13692E-09    | 8.52691E-10     | 3.97923E-09             |
| <i>Cryptosporidium</i> | 8.13062E-08 | 2.38696E-09 | 1.65132E-08    | 1.892E-09       | 7.56823E-08             |
| <i>E. coli</i> O157:H7 | 5.68574E-09 | 5.26971E-09 | 1.3868E-11     | 1.0401E-11      | 4.8537E-11              |
| <i>Giardia</i>         | 1.37434E-10 | 4.295E-12   | 3.0841E-11     | 3.392E-12       | 1.36576E-10             |
| Norovirus              | 1.77669E-06 | 5.76636E-08 | 3.82443E-07    | 4.25618E-08     | 1.78795E-06             |
| <i>Salmonella</i>      | 6.69518E-10 | 6.20529E-10 | 1.63292E-12    | 1.22458E-12     | 5.7154E-12              |
